# Supplementary material for: Thermal strain-induced cold crystallization of amorphous poly(lactic acid)
Source: Royal Society of Chemistry journal article supplement (doi:10.1039/c6ce00464d), 2016-01-01
Supplement: c6ce00464d1.pdf [file c6ce00464d1.pdf]

### Supporting data

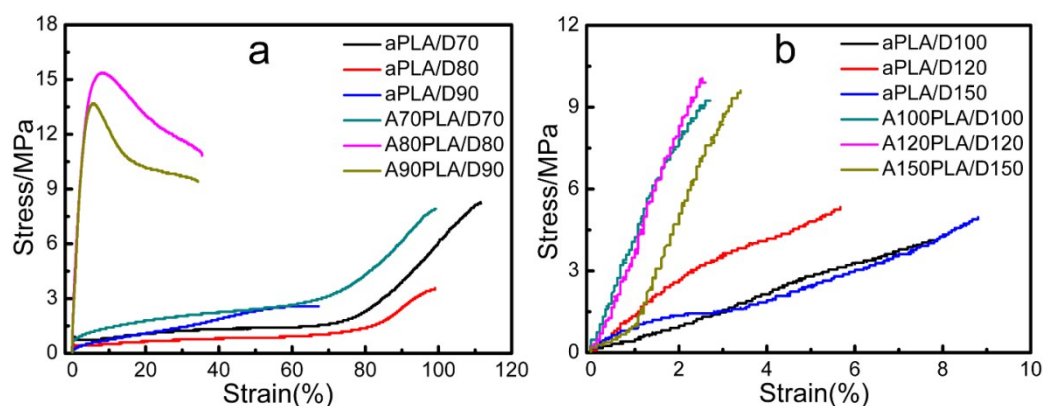

Figure S1. The engineering stress-strain curves of (a) aPLA, A70PLA, A80PLA, and A90PLA stretched at 70°C, 80°C, and 90°C, (b) aPLA, A100PLA, A120PLA, and A150PLA stretched at 100°C, 120°C, and 150°C, respectively. The aPLA corresponds to the amorphous PLA sample, and the A70PLA, A80PLA, A90PLA, A100PLA, A120PLA, and A150PLA correspond to the PLA samples annealed at 70 °C, 80 °C, 90 °C, 100 °C, 120 °C, and 150 °C for 12hours, respectively. The aPLA/D70, aPLA/D80, aPLA/D90, aPLA/D100, aPLA/D120, aPLA/D150A correspond to amorphous PLA drawn at 70°C, 80°C, 90°C, 100°C, 120°C and 150°C, respectively, and the A70PLA/D70, A80PLA/D80, A90PLA/D90, A100PLA/D100, A120PLA/D120, and A150PLA/D150 correspond to annealed PLA drawn at 70°C, 80°C, 90°C, 100°C, 120°C and 150°C, respectively.
